# Supplementary material for: Low Dose DMSO Treatment Induces Oligomerization and Accelerates Aggregation of α-Synuclein
Source: Research Square preprint supplement (doi:10.21203/rs.3.rs-491469/v1), 2021-05-06
Supplement: Supplementary file 1 [file 5c82f04f703b2387856f57e7.pdf]

# Supplementary information

## **Low dose DMSO treatment induces oligomerization and accelerates aggregation of $\alpha$ -synuclein**

### **Authors**

\*Lasse Reimer<sup>a,b</sup>, Caroline Haikal<sup>c</sup>, Hjalte Gram<sup>a,b</sup>, Harm Ruesink<sup>a,b</sup>, Andreas Baun<sup>a,b</sup>, Theresa Gewering<sup>d</sup>, Arne Moeller<sup>d,e</sup>, Jia-Yi Li<sup>c,f</sup> and Poul Henning Jensen<sup>a,b</sup>

<sup>a</sup>Danish Research Institute of Translational Neuroscience - DANDRITE, Aarhus University, Denmark.

<sup>b</sup>Department of Biomedicine, Aarhus University, Denmark.

<sup>c</sup>Neural Plasticity and Repair Unit, Wallenberg Neuroscience Center, Department of Experimental Medical Science, Lund University, Lund, Sweden.

<sup>d</sup>The Max Planck Institute of Biophysics, Frankfurt, Germany

<sup>e</sup>University of Osnabrück, Germany

<sup>f</sup>Institute of Health Sciences, China Medical University, 110112 Shenyang, P. R. China

\* Corresponding author

**In vitro aggregation  
(sedimentation of  $\alpha$ -syn + DMSO)**

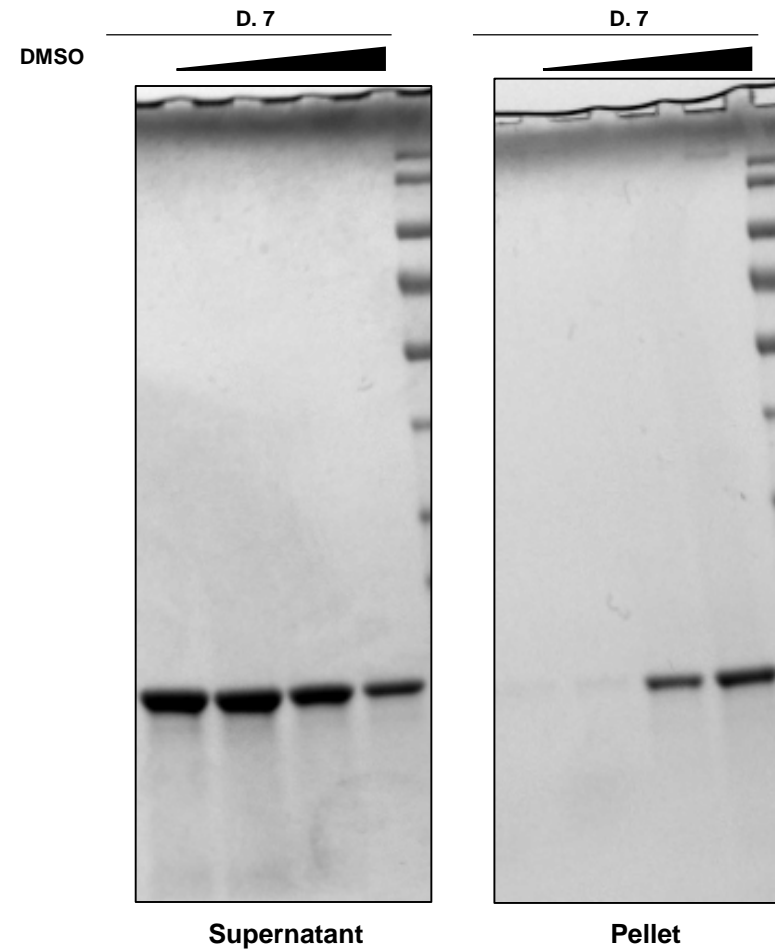

*Supplementary Information 1)  
Full-length SDS-PAGE gels of data presented in  
original figure 1F. Due to unbalanced image,  
PageRuler is visual in outer right lane of both  
supernatant and pellet gels.*

# Proteinase K digestion

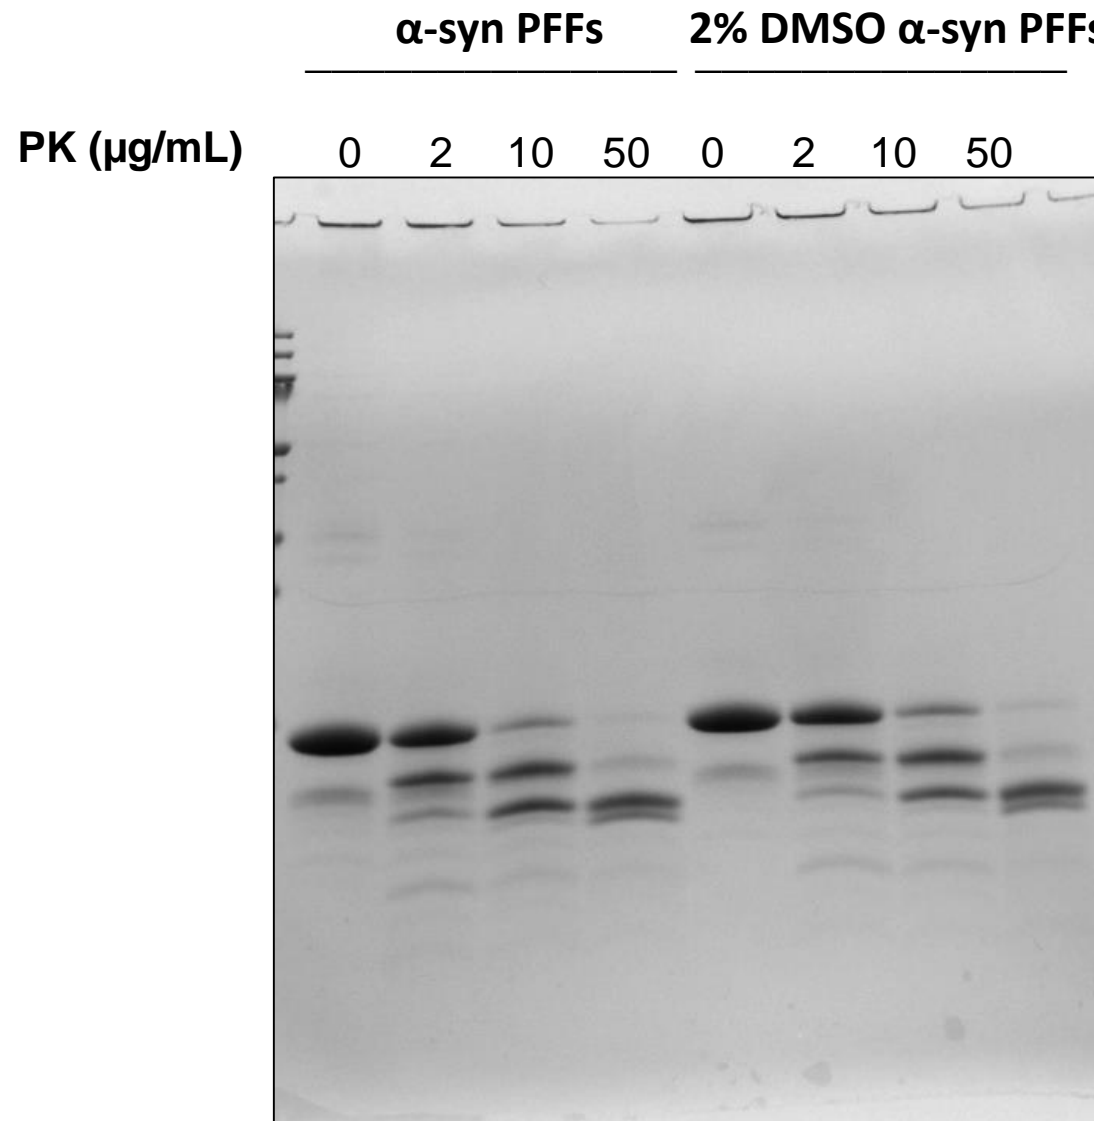

Supplementary Information 2)  
Full-length SDS-PAGE gels of data presented in  
original figure 2B. Due to unbalanced image,  
PageRuler is visual in outer left lane.
